# Supplementary material for: High Response Rate and Durability Driven by HLA Genetic Diversity in Patients with Kidney Cancer Treated with Lenvatinib and Pembrolizumab
Source: Oxford University Press journal article supplement (doi:10.1158/1541-7786.mcr-21-0053), 2021-05-26
Supplement: 15417786mcr210053-sup-259350_2_supp_7039210_qr7mqg.xlsx [file 15417786mcr210053-sup-259350_2_supp_7039210_qr7mqg.xlsx]

## Sheet: lenvatinib pembrolizumab cohort
Patient	HLA class-I type	Mean HED
EIS01	A0201,A0201,B5001,B4402,C0704,C0602	4.02762
EIS02	A0101,A0201,B0702,B0801,C0702,C0701	5.49908
EIS03	A0101,A7403,B4403,B0801,C0701,C0401	8.4291
EIS04	A0301,A0101,B0702,B3701,C0702,C0602	6.62615
EIS06	A0201,A2902,B5501,B4403,C0303,C1601	8.07367
LEN06	A3001,A0201,B1302,B1801,C0701,C0602	6.83978
LEN07	A3401,A0201,B3505,B1513,C0401,C0801	6.92449
LEN10	A2402,A0101,B0801,B1801,C0701,C0303	8.44936
LEN14	A0101,A3101,B3901,B5701,C0602,C1203	7.86372
LEN17	A0301,A3001,B1302,B5101,C0602,C1402	4.81768
LEN20	A2601,A2402,B5102,B4901,C0701,C0202	7.78269
LEN01	A3001,A6801,B5801,B5501,C0706,C0102	7.64088
LEN02	A0101,A2402,B1501,B0801,C0701,C0303	9.02578
LEN03	A3002,A0201,B4402,B3501,C0501,C0401	7.21915
LEN04	A6802,A0205,B1801,B5802,C0501,C0602	6.57643
LEN05	A0301,A2403,B5101,B3508,C0102,C0401	7.57643
LEN08	A3001,A3001,B4501,B4901,C0701,C1601	3.31492
LEN09	A7401,A3303,B1503,B1503,C0210,C0210	0.686924
LEN11	A0301,A0201,B3501,B1501,C0304,C0401	5.71455
LEN12	A0301,A0201,B4001,B0801,C0701,C0304	6.59668
LEN13	A0301,A2402,B4101,B4402,C1604,C1701	7.88398
LEN15	A0201,A0201,B2705,B3801,C0102,C1203	3.96685
LEN16	A3001,A1101,B1302,B5101,C0102,C0602	6.06814
LEN18	A3002,A6801,B4402,B4001,C0704,C0304	7.64825

## Sheet: mskimpact ccRCC cohort
Patient	HLA class-I type	Mean HED	HLAA_coverage	HLAB_coverage	HLAC_coverage	HLAI_mean_coverage
P-0005187	A3201,A2601,B1801,B5101,C1502,C1203	6.92818	746	260.88	266	424
P-0006542	A2902,A2601,B1402,B1801,C1203,C0802	4.87845	559.25	229.62	242.5	344
P-0007286	A1101,A2601,B5501,B1801,C0303,C1203	5.41252	1007.12	256	238.62	501
P-0007399	A2402,A6801,B2705,B1801,C1502,C0701	8.53223	364	127.5	143.25	212
P-0007806	A0101,A6801,B3701,B4001,C0304,C0602	7.60221	517.38	127.25	139.62	261
P-0008137	A1101,A0205,B5001,B3508,C0401,C0602	6.56538	773.38	150	184.62	369
P-0008459	A0301,A3002,B5701,B1801,C0501,C0602	7.36096	869.88	176.12	259.62	435
P-0009347	A1101,A2901,B0705,B1402,C0802,C1505	5.40147	776.75	326.5	214.75	439
P-0009348	A0301,A0101,B0702,B3701,C0602,C0702	6.62615	850.62	272.12	248.38	457
P-0011246	A1101,A2402,B3502,B5201,C0401,C1202	7.72192	796.5	123.62	147.62	356
P-0012570	A2402,A0201,B0702,B3901,C0702,C0702	5.61326	562.5	291.88	243.75	366
P-0017823	A0201,A0201,B2705,B5101,C0102,C0701	6.13628	844.25	732	610.25	729
P-0017959	A6601,A0201,B0801,B0801,C0701,C1701	6.33702	658.38	744.12	455.12	619
P-0025019	A0301,A3201,B3501,B1801,C1203,C0401	5.73665	1104.25	842.5	553.62	833
P-0025027	A1101,A3101,B1509,B3503,C1203,C0704	4.86556	826.75	659.25	485.5	657
P-0007834	A0101,A0201,B5001,B4001,C0304,C0602	7.26519	900.5	234.75	237	457
P-0007961	A0101,A2601,B0801,B1402,C0802,C0701	6.18785	510.5	160	154.88	275
P-0008566	A2402,A3201,B0705,B1517,C1505,C0701	8.79742	561.75	303.5	255.75	374
P-0009717	A0101,A2902,B4403,B4402,C1601,C0501	3.90424	853.25	179.5	220.38	418
P-0012253	A0201,A0201,B0702,B1801,C0702,C0701	3.37569	783.88	357.5	340.12	494
P-0013463	A0101,A0101,B5501,B1517,C0102,C0701	5.74033	1257	320.38	368.75	649
P-0014594	A1101,A2902,B5001,B5201,C1202,C0602	4.97238	897.12	607.25	331.12	612
P-0014698	A3101,A0201,B3503,B5101,C1502,C0401	6.41805	1179.88	904.12	443.5	842
P-0015227	A1101,A6801,B4001,B3503,C0304,C0401	6.06998	1174.38	811.88	319.5	769
P-0017835	A2402,A0201,B1501,B4405,C0304,C0202	7.94659	488.12	467.88	255.12	404
P-0018234	A0201,A3101,B2705,B4402,C0102,C0501	7.23757	1221	889.12	598.38	903
P-0018628	A1101,A2402,B3508,B1302,C0401,C0602	8.32413	1008.62	808.38	552.38	790
P-0019213	A3004,A6802,B1503,B5801,C0210,C0706	7.01842	1500.5	1056.5	853.12	1137
P-0019592	A0301,A0201,B0702,B1501,C0304,C0702	7.51381	1402.88	1319	543	1088
P-0020362	A3201,A0201,B1801,B5101,C0202,C0701	8.28729	1225.12	1232.75	898.12	1119
P-0022093	A0301,A0301,B0702,B1402,C0802,C0702	4.57459	1576	1274	809.25	1220
P-0022541	A3001,A0201,B3501,B1302,C0401,C0602	7.23389	1265.75	732.88	592.12	864
P-0024385	A0101,A0205,B3501,B3508,C0401,C0706	7.89134	1224.25	920.12	840.5	995
P-0025167	A2402,A2601,B3501,B1517,C0401,C0701	9.46961	955	914.5	734	868
P-0025849	A0301,A0201,B0702,B0702,C0702,C0702	2.1418	1269.88	1559.5	907	1245
P-0026483	A1101,A2402,B5101,B5101,C1402,C0102	4.80663	934.75	739.75	390	688
P-0026711	A0301,A3201,B1501,B2705,C0303,C0202	7.49724	1291.5	1027.88	574.75	965
P-0027585	A0201,A3303,B0702,B4403,C1602,C0702	9.04604	1077.75	1110.12	698.62	962
P-0028103	A0301,A0101,B0801,B4403,C1601,C0701	7.7035	1163.25	799.62	597.12	853
P-0031908	A3001,A0101,B4002,B3501,C1502,C0704	7.95212	1200.12	601.38	323.12	708
P-0035582	A0301,A2902,B0702,B4501,C0602,C0702	6.14917	1294.38	1067.38	678	1013
